# Supplementary material
Source: PubMed Central journal article supplement (PMC4643531)
Supplement: supp_dev245_dev245supp_fig1.pdf [file supp_dev245_dev245supp_fig1.pdf]

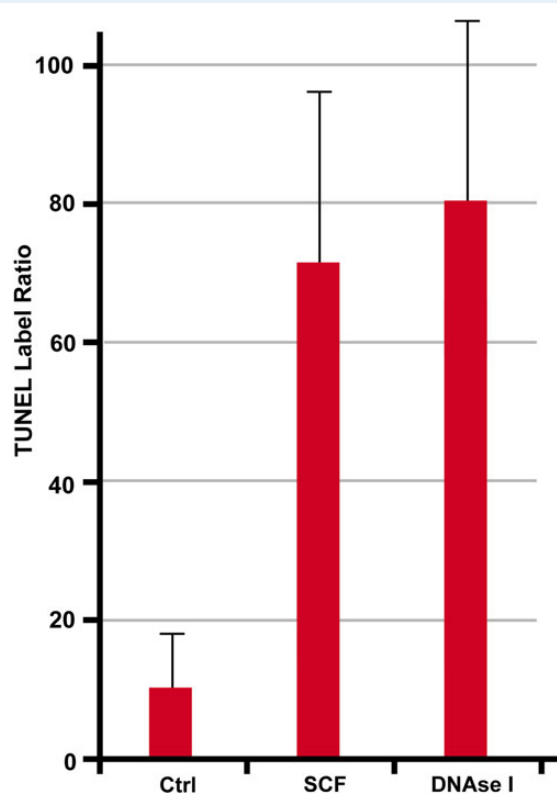

**Supplementary Figure S1** Induction of DNA strand breaks with DNase I as control for the TUNEL assay. Vas deferens sperm were treated with divalent cations to induce SCF or with DNase I to induce DNA breaks as a control. The TUNEL assay identified DNA breaks induced by the nuclease.
