# Supplementary material
Source: PubMed Central journal article supplement (PMC4643531)
Supplement: supp_dev245_dev245supp_table1.pdf [file supp_dev245_dev245supp_table1.pdf]

**Supplementary Table S1 Live/dead assay for sperm induced to undergo sperm chromatin fragmentation (SCF).**

| Sperm source |         | Live $\pm$ SD (%) |
|--------------|---------|-------------------|
| Epididymis   | Control | 78.0 $\pm$ 7.4    |
|              | SCF     | 18.0 $\pm$ 8.4    |
| Vas deferens | Control | 64.6 $\pm$ 6.5    |
|              | SCF     | 16.7 $\pm$ 6.7    |

Epididymal or vas deferens sperm were incubated for 30 min at room temperature with (SCF) or without (control) divalent cations to induce SCF. The sperm were then assayed using the live dead assay. All sperm that were seen to be live by fluorescence were also motile. The assay was performed eight times for each group. The difference between the two control groups and between the two SCF treated samples was not statistically significant, as measured by Student's *t*-test. However, the differences between control sample and SCF sample were highly statistically significant ( $P < 0.0001$ ).
