# Supplementary material
Source: PubMed Central journal article supplement (PMC4643531)
Supplement: supp_dev245_dev245supp_table2.pdf [file supp_dev245_dev245supp_table2.pdf]

**Supplementary Table SII Statistical significance DFI of SCSA assay.**

|   | <b>b</b> | <b>c</b> | <b>d</b> | <b>e</b> | <b>f</b> | <b>g</b> | <b>h</b> | <b>i</b> | <b>j</b> | <b>k</b> | <b>l</b> | <b>m</b> | <b>n</b> | <b>o</b> | <b>p</b> | <b>q</b> | <b>r</b> |
|---|----------|----------|----------|----------|----------|----------|----------|----------|----------|----------|----------|----------|----------|----------|----------|----------|----------|
| a | 0.0197   | 0.0338   | 0.0001   | 0.0001   | 0.0001   | 0.1176   | 0.0001   | 0.0046   | 0.0001   | 0.0024   | 0.0259   | 0.0001   | 0.0001   | 0.2149   | 0.0015   | 0.028    | 0.0001   |
| b | b        | 0.2653   | 0.0001   | 0.0805   | 0.0001   | 0.0159   | 0.8893   | 0.5367   | 0.0001   | 0.0072   | 0.0072   | 0.0001   | 0.8857   | 0.0824   | 0.0676   | 0.0659   | 0.0004   |
| c |          | c        | 0.0001   | 0.7433   | 0.0001   | 0.0306   | 0.2508   | 0.4129   | 0.0001   | 0.0325   | 0.0291   | 0.0001   | 0.2085   | 0.059    | 0.0586   | 0.0568   | 0.0091   |
| d |          |          | d        | 0.0001   | 0.98     | 0.0001   | 0.0001   | 0.0001   | 0.2302   | 0.0002   | 0.0001   | 0.247    | 0.0001   | 0.0001   | 0.0001   | 0.0001   | 0.0001   |
| e |          |          |          | e        | 0.0001   | 0.0001   | 0.0033   | 0.2218   | 0.0001   | 0.013    | 0.0001   | 0.0001   | 0.0008   | 0.0005   | 0.0001   | 0.0001   | 0.0006   |
| f |          |          |          |          | f        | 0.0001   | 0.0001   | 0.0001   | 0.0184   | 0.0002   | 0.0001   | 0.0088   | 0.0001   | 0.0001   | 0.0001   | 0.0001   | 0.0001   |
| g |          |          |          |          |          | g        | 0.0001   | 0.0038   | 0.0001   | 0.0023   | 0.3554   | 0.0001   | 0.0001   | 0.1416   | 0.0006   | 0.0132   | 0.0001   |
| h |          |          |          |          |          |          | h        | 0.4631   | 0.0001   | 0.0064   | 0.0001   | 0.0001   | 0.0001   | 0.224    | 0.0055   | 0.0001   | 0.0004   |
| i |          |          |          |          |          |          |          | i        | 0.0001   | 0.0093   | 0.0001   | 0.0001   | 0.3017   | 0.0227   | 0.0151   | 0.0155   | 0.0006   |
| j |          |          |          |          |          |          |          |          | j        | 0.0001   | 0.0001   | 0.7605   | 0.0001   | 0.0001   | 0.0001   | 0.0001   | 0.0001   |
| k |          |          |          |          |          |          |          |          |          | k        | 0.0022   | 0.0001   | 0.0058   | 0.0031   | 0.0031   | 0.003    | 0.8347   |
| l |          |          |          |          |          |          |          |          |          |          | l        | 0.0001   | 0.0001   | 0.1135   | 0.0004   | 0.0089   | 0.0001   |
| m |          |          |          |          |          |          |          |          |          |          |          | m        | 0.0001   | 0.0001   | 0.0001   | 0.0001   | 0.0001   |
| n |          |          |          |          |          |          |          |          |          |          |          |          | n        | 0.007    | 0.0001   | 0.0002   | 0.0002   |
| o |          |          |          |          |          |          |          |          |          |          |          |          |          | o        | 0.8249   | 0.9352   | 0.0001   |
| p |          |          |          |          |          |          |          |          |          |          |          |          |          |          | p        | 0.8088   | 0.0001   |
| q |          |          |          |          |          |          |          |          |          |          |          |          |          |          |          | q        | 0.0001   |

Letters correspond to the bars in Fig. 1. Numbers are *P* values for Student's *t*-test comparisons between each group. For 0.0001,  $P < 0.0001$ .
