# Supplementary material
Source: PubMed Central journal article supplement (PMC4643531)
Supplement: supp_dev245_dev245supp_table3.pdf [file supp_dev245_dev245supp_table3.pdf]

**Supplementary Table SIII Statistical significance HDS of SCSA assay.**

|   | <b>b</b> | <b>c</b> | <b>d</b> | <b>e</b> | <b>F</b> | <b>g</b> | <b>h</b> | <b>i</b> | <b>j</b> | <b>k</b> | <b>l</b> | <b>m</b> | <b>n</b> | <b>o</b> | <b>p</b> | <b>q</b> | <b>r</b> |
|---|----------|----------|----------|----------|----------|----------|----------|----------|----------|----------|----------|----------|----------|----------|----------|----------|----------|
| a | 0.5726   | 0.0016   | 0.0083   | 0.0009   | 0.0001   | 0.0001   | 0.0012   | 0.0002   | 0.0017   | 0.1831   | 0.0026   | 0.5529   | 0.0001   | 0.9719   | 0.0001   | 0.0078   | 0.0082   |
| b | b        | 0.0055   | 0.0133   | 0.0035   | 0.0001   | 0.6665   | 0.0027   | 0.0006   | 0.0037   | 0.1318   | 0.0045   | 0.8202   | 0.0001   | 0.7825   | 0.0001   | 0.0172   | 0.0114   |
| c |          | c        | 0.181    | 0.809    | 0.0003   | 0.0212   | 0.0887   | 0.0523   | 0.1382   | 0.0114   | 0.069    | 0.0583   | 0.0001   | 0.0915   | 0.0004   | 0.7591   | 0.0774   |
| d |          |          | d        | 0.1997   | 0.2285   | 0.0223   | 0.8111   | 0.7792   | 0.6927   | 0.0084   | 0.7792   | 0.0318   | 0.0405   | 0.041    | 0.0546   | 0.2877   | 0.4333   |
| e |          |          |          | e        | 0.0002   | 0.0147   | 0.099    | 0.0496   | 0.1567   | 0.0099   | 0.0758   | 0.0467   | 0.0001   | 0.0805   | 0.0003   | 0.8598   | 0.0832   |
| f |          |          |          |          | F        | 0.0002   | 0.0359   | 0.0006   | 0.0251   | 0.0009   | 0.2954   | 0.0011   | 0.0056   | 0.0049   | 0.0657   | 0.0058   | 0.974    |
| g |          |          |          |          |          | g        | 0.0064   | 0.0029   | 0.0088   | 0.1018   | 0.0082   | 0.9239   | 0.0001   | 0.6289   | 0.0002   | 0.04     | 0.0164   |
| h |          |          |          |          |          |          | h        | 0.4733   | 0.8199   | 0.0049   | 0.5317   | 0.0154   | 0.0024   | 0.0304   | 0.0081   | 0.2404   | 0.2935   |
| i |          |          |          |          |          |          |          | i        | 0.6773   | 0.0048   | 0.2375   | 0.0137   | 0.0001   | 0.0356   | 0.0008   | 0.3622   | 0.1704   |
| j |          |          |          |          |          |          |          |          | j        | 0.0058   | 0.4284   | 0.02     | 0.0019   | 0.0369   | 0.0063   | 0.3282   | 0.249    |
| k |          |          |          |          |          |          |          |          |          | k        | 0.0047   | 0.142    | 0.0004   | 0.3327   | 0.0005   | 0.0133   | 0.0066   |
| l |          |          |          |          |          |          |          |          |          |          | l        | 0.0143   | 0.038    | 0.0235   | 0.0578   | 0.1414   | 0.5396   |
| m |          |          |          |          |          |          |          |          |          |          |          | m        | 0.0003   | 0.7013   | 0.0006   | 0.0701   | 0.0204   |
| n |          |          |          |          |          |          |          |          |          |          |          |          | n        | 0.0017   | 0.9311   | 0.0007   | 0.4233   |
| o |          |          |          |          |          |          |          |          |          |          |          |          |          | o        | 0.0023   | 0.0909   | 0.0241   |
| p |          |          |          |          |          |          |          |          |          |          |          |          |          |          | p        | 0.0022   | 0.432    |
| q |          |          |          |          |          |          |          |          |          |          |          |          |          |          |          | q        | 0.1134   |

Letters correspond to the bars in Fig. 2. Numbers are *P* values for Student's *t*-test comparisons between each group. For 0.0001,  $P < 0.0001$ .
