# Supplementary material
Source: PubMed Central journal article supplement (PMC4643531)
Supplement: supp_dev245_dev245supp_table4.pdf [file supp_dev245_dev245supp_table4.pdf]

**Supplementary Table SIV Statistical significance for TUNEL assay.**

|   | <b>b</b> | <b>c</b> | <b>d</b> | <b>e</b> | <b>F</b> | <b>g</b> | <b>h</b> | <b>i</b> | <b>j</b> | <b>k</b> | <b>l</b> | <b>m</b> | <b>n</b> | <b>o</b> | <b>p</b> | <b>q</b> | <b>r</b> |
|---|----------|----------|----------|----------|----------|----------|----------|----------|----------|----------|----------|----------|----------|----------|----------|----------|----------|
| a | 0.0684   | 0.0005   | 0.0001   | 0.0669   | 0.0001   | 0.6087   | 0.1855   | 0.2737   | 0.0001   | 0.3599   | 0.2289   | 0.0062   | 0.0001   | 0.7348   | 0.0411   | 0.1303   | 0.0001   |
| b | b        | 0.0768   | 0.0001   | 0.2009   | 0.0003   | 0.1866   | 0.9683   | 0.4333   | 0.0001   | 0.1038   | 0.5732   | 0.0318   | 0.0001   | 0.1506   | 0.119    | 0.4446   | 0.0004   |
| c |          | c        | 0.0001   | 0.5602   | 0.001    | 0.0153   | 0.2205   | 0.0408   | 0.0001   | 0.0049   | 0.0501   | 0.1403   | 0.0002   | 0.0075   | 0.322    | 0.8897   | 0.0013   |
| d |          |          | d        | 0.0053   | 0.7413   | 0.0014   | 0.0032   | 0.0018   | 0.3099   | 0.0003   | 0.0006   | 0.0207   | 0.5943   | 0.0004   | 0.04     | 0.0013   | 0.8      |
| e |          |          |          | e        | 0.0283   | 0.2509   | 0.4347   | 0.3185   | 0.0068   | 0.1727   | 0.2831   | 0.613    | 0.0136   | 0.1893   | 0.7533   | 0.6128   | 0.0247   |
| f |          |          |          |          | f        | 0.0103   | 0.0196   | 0.013    | 0.2834   | 0.0034   | 0.0057   | 0.0809   | 0.4923   | 0.0037   | 0.1219   | 0.0097   | 0.9513   |
| g |          |          |          |          |          | g        | 0.3671   | 0.0072   | 0.0001   | 0.4209   | 0.3089   | 0.0881   | 0.0063   | 0.8421   | 0.2241   | 0.338    | 0.0118   |
| h |          |          |          |          |          |          | h        | 0.6013   | 0.0003   | 0.2484   | 0.7253   | 0.1873   | 0.0112   | 0.3154   | 0.3605   | 0.6351   | 0.0218   |
| i |          |          |          |          |          |          |          | i        | 0.0001   | 0.003    | 0.7484   | 0.1172   | 0.0074   | 0.1539   | 0.2714   | 0.4476   | 0.0149   |
| j |          |          |          |          |          |          |          |          | j        | 0.0001   | 0.0001   | 0.01     | 0.687    | 0.0001   | 0.0368   | 0.0012   | 0.3426   |
| k |          |          |          |          |          |          |          |          |          | k        | 0.1849   | 0.0451   | 0.0017   | 0.5529   | 0.1454   | 0.2464   | 0.0041   |
| l |          |          |          |          |          |          |          |          |          |          | l        | 0.086    | 0.0026   | 0.2944   | 0.2222   | 0.4411   | 0.0067   |
| m |          |          |          |          |          |          |          |          |          |          |          | m        | 0.0327   | 0.0506   | 0.9158   | 0.2902   | 0.079    |
| n |          |          |          |          |          |          |          |          |          |          |          |          | n        | 0.0018   | 0.0682   | 0.0045   | 0.5385   |
| o |          |          |          |          |          |          |          |          |          |          |          |          |          | o        | 0.1571   | 0.2753   | 0.0045   |
| p |          |          |          |          |          |          |          |          |          |          |          |          |          |          | p        | 0.4545   | 0.1148   |
| q |          |          |          |          |          |          |          |          |          |          |          |          |          |          |          | q        | 0.0094   |

Letters correspond to the bars in Fig. 3. Numbers are *P* values for Student's *t*-test comparisons between each group. For 0.0001, *P* < 0.0001.
